# Supplementary material for: Combining inhibition of galectin-3 with and before a therapeutic vaccination is critical for the prostate-tumor-free outcome
Source: HighWire-hosted journal article supplement (doi:10.1136/jitc-2020-001535), 2020-12-01
Supplement: jitc-2020-001535supp001_data_supplement.pdf [file jitc-2020-001535supp001_data_supplement.pdf]

**Table S3:** Antibodies used to determine galectins, intra- and extra-cellular- proteins and housekeeping gene.

| Protein                                  | Antibody catalog #      | Dilution |
|------------------------------------------|-------------------------|----------|
| $\beta$ -tubulin                         | H-235, Santa Cruz       | 1:500    |
| Galectin-3                               | H-160, Santa Cruz       | 1:400    |
| Goat Anti-Rabbit IgG H&L -HRP conjugated | Ab97051, Abcam          | 1:10,000 |
| $\alpha$ CD8 $\alpha$ -APC               | 561093, BD Pharmingen   | 1:500    |
| $\alpha$ CD69-PE                         | 553237, BD Pharmingen   | 1:100    |
| $\alpha$ CD107a-PE                       | 558661, BD Pharmingen   | 1:100    |
| $\alpha$ CD45.1-PE                       | 553776, BD Pharmingen   | 1:100    |
| $\alpha$ CD69-PeCy7                      | 552879, BD Pharmingen   | 1:100    |
| $\alpha$ CD4-APC                         | 22150046sp, ImmunoTools | 1:500    |
| $\alpha$ CD122-FITC                      | 11-1222-82, Invitrogen  | 1:200    |
| $\alpha$ FoxP3-PE                        | 560414, BD Bioscience   | 1:100    |
| $\alpha$ CD25-FITC                       | M5912, Ligands Biotech  | 1:200    |
| $\alpha$ CD80-PE                         | 12-0807-81, Invitrogen  | 1:200    |
| $\alpha$ MHCII-PerCP                     | 46-5321-80, Invitrogen  | 1:500    |
| $\alpha$ CD11c-PECy7                     | 25-0114-81, Invitrogen  | 1:200    |
