# Supplementary material for: Combining inhibition of galectin-3 with and before a therapeutic vaccination is critical for the prostate-tumor-free outcome
Source: HighWire-hosted journal article supplement (doi:10.1136/jitc-2020-001535), 2020-12-01
Supplement: jitc-2020-001535supp006_data_supplement.pdf [file jitc-2020-001535supp006_data_supplement.pdf]

**Table S1:** List of shRNAs targeting the different mRNA sequences.

| <b>LV-shRNA</b> | <b>shRNA target sequence (5' → 3')</b> |
|-----------------|----------------------------------------|
| shCtrl          | GAUAGCAAUGACGAAUGCG                    |
| shGal-3         | CAACAGGAGAGUCAUUGUG                    |
