# Supplementary material for: Combining inhibition of galectin-3 with and before a therapeutic vaccination is critical for the prostate-tumor-free outcome
Source: HighWire-hosted journal article supplement (doi:10.1136/jitc-2020-001535), 2020-12-01
Supplement: jitc-2020-001535supp007_data_supplement.pdf [file jitc-2020-001535supp007_data_supplement.pdf]

**Table S2:** Tumorigenicity of TC1 cell line depends on Gal-3 expression in immune-competent but not in immune-deficient mice. (\*:  $p < 0.05$ , \*\*:  $p < 0.01$ , Student t-test).

| Cell lines /mouse      | N  | Tumor incidence (%) | Latency (days) | Duplication time (days) | Metastasis frequency |
|------------------------|----|---------------------|----------------|-------------------------|----------------------|
| TC1-shCtrl /C57BL6 WT  | 14 | 92                  | 39±11          | 7±2                     | 80%                  |
| TC1-shGal-3 /C57BL6 WT | 23 | 65*                 | 81±43*         | 6±1                     | 25%                  |
| TC1-shCtrl / nude      | 7  | 100                 | 27±5           | 11±1                    | 100%                 |
| TC1-shGal-3 / nude     | 8  | 100                 | 27±2           | 7±1**                   | 100%                 |
