# Supplementary figures and images for: Combining inhibition of galectin-3 with and before a therapeutic vaccination is critical for the prostate-tumor-free outcome
Source: HighWire-hosted journal article supplement (doi:10.1136/jitc-2020-001535), 2020-12-01

Figure S3

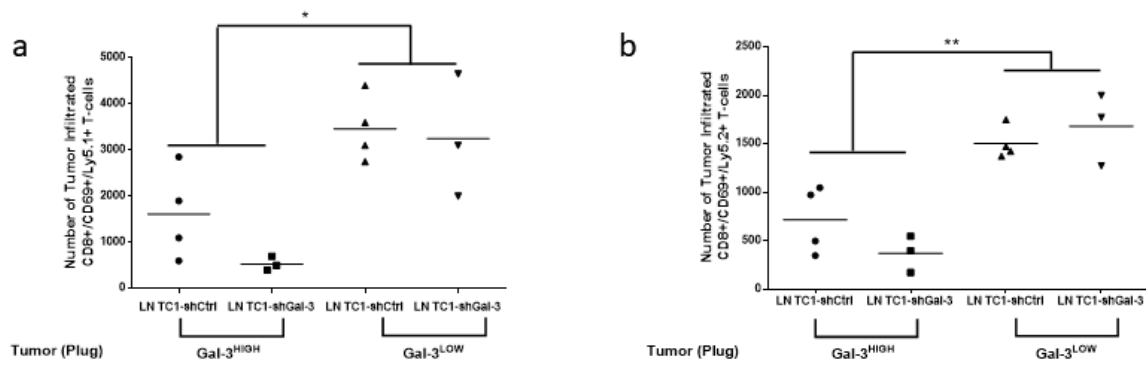

Supplement: jitc-2020-001535supp004_data_supplement.pdf [file jitc-2020-001535supp004_data_supplement.pdf]
